# Supplementary material
Source: PubMed Central journal article supplement (PMC6374155)
Supplement: NIHMS1517958-supplement-Permission_to_Reprint_Figure_2.pdf [file NIHMS1517958-supplement-Permission_to_Reprint_Figure_2.pdf]

**ELSEVIER LICENSE  
TERMS AND CONDITIONS**

Dec 28, 2018

This Agreement between Marc Lande ("You") and Elsevier ("Elsevier") consists of your license details and the terms and conditions provided by Elsevier and Copyright Clearance Center.

|                                                 |                                                                                                                                                                                                    |
|-------------------------------------------------|----------------------------------------------------------------------------------------------------------------------------------------------------------------------------------------------------|
| License Number                                  | 4474780925624                                                                                                                                                                                      |
| License date                                    | Nov 23, 2018                                                                                                                                                                                       |
| Licensed Content Publisher                      | Elsevier                                                                                                                                                                                           |
| Licensed Content Publication                    | The Journal of Pediatrics                                                                                                                                                                          |
| Licensed Content Title                          | Neurocognitive Function in Children with Primary Hypertension                                                                                                                                      |
| Licensed Content Author                         | Marc B. Lande, Donald L. Batsky, Juan C. Kupferman, Joshua Samuels, Stephen R. Hooper, Bonita Falkner, Shari R. Waldstein, Peter G. Szilagyi, Hongyue Wang, Jennifer Staskiewicz, Heather R. Adams |
| Licensed Content Date                           | Jan 1, 2017                                                                                                                                                                                        |
| Licensed Content Volume                         | 180                                                                                                                                                                                                |
| Licensed Content Issue                          | n/a                                                                                                                                                                                                |
| Licensed Content Pages                          | 9                                                                                                                                                                                                  |
| Start Page                                      | 148                                                                                                                                                                                                |
| End Page                                        | 155.e1                                                                                                                                                                                             |
| Type of Use                                     | reuse in a journal/magazine                                                                                                                                                                        |
| Requestor type                                  | author of new work                                                                                                                                                                                 |
| Intended publisher of new work                  | Wolters Kluwer Health, LWW                                                                                                                                                                         |
| Portion                                         | figures/tables/illustrations                                                                                                                                                                       |
| Number of figures/tables/illustrations          | 2                                                                                                                                                                                                  |
| Format                                          | both print and electronic                                                                                                                                                                          |
| Are you the author of this Elsevier article?    | Yes                                                                                                                                                                                                |
| Will you be translating?                        | No                                                                                                                                                                                                 |
| Original figure numbers                         | Table III. Figure 1.                                                                                                                                                                               |
| Title of the article                            | BP and cognition in children                                                                                                                                                                       |
| Publication new article is in                   | Hypertension                                                                                                                                                                                       |
| Publisher of the new article                    | Wolters Kluwer Health, LWW                                                                                                                                                                         |
| Author of new article                           | Marc Lande                                                                                                                                                                                         |
| Expected publication date                       | Feb 2019                                                                                                                                                                                           |
| Estimated size of new article (number of pages) | 3                                                                                                                                                                                                  |

Requestor Location            Marc Lande  
                                         601 Elmwood Ave  
                                         Box 777  
  
                                         Rochester, NY 14642  
                                         United States  
                                         Attn: Marc Lande

Publisher Tax ID            98-0397604

Total                            0.00 USD

Terms and Conditions

### INTRODUCTION

1. The publisher for this copyrighted material is Elsevier. By clicking "accept" in connection with completing this licensing transaction, you agree that the following terms and conditions apply to this transaction (along with the Billing and Payment terms and conditions established by Copyright Clearance Center, Inc. ("CCC"), at the time that you opened your Rightslink account and that are available at any time at <http://myaccount.copyright.com>).

### GENERAL TERMS

2. Elsevier hereby grants you permission to reproduce the aforementioned material subject to the terms and conditions indicated.

3. Acknowledgement: If any part of the material to be used (for example, figures) has appeared in our publication with credit or acknowledgement to another source, permission must also be sought from that source. If such permission is not obtained then that material may not be included in your publication/copies. Suitable acknowledgement to the source must be made, either as a footnote or in a reference list at the end of your publication, as follows:

"Reprinted from Publication title, Vol /edition number, Author(s), Title of article / title of chapter, Pages No., Copyright (Year), with permission from Elsevier [OR APPLICABLE SOCIETY COPYRIGHT OWNER]." Also Lancet special credit - "Reprinted from The Lancet, Vol. number, Author(s), Title of article, Pages No., Copyright (Year), with permission from Elsevier."

4. Reproduction of this material is confined to the purpose and/or media for which permission is hereby given.

5. Altering/Modifying Material: Not Permitted. However figures and illustrations may be altered/adapted minimally to serve your work. Any other abbreviations, additions, deletions and/or any other alterations shall be made only with prior written authorization of Elsevier Ltd. (Please contact Elsevier at [permissions@elsevier.com](mailto:permissions@elsevier.com)). No modifications can be made to any Lancet figures/tables and they must be reproduced in full.

6. If the permission fee for the requested use of our material is waived in this instance, please be advised that your future requests for Elsevier materials may attract a fee.

7. Reservation of Rights: Publisher reserves all rights not specifically granted in the combination of (i) the license details provided by you and accepted in the course of this licensing transaction, (ii) these terms and conditions and (iii) CCC's Billing and Payment terms and conditions.

8. License Contingent Upon Payment: While you may exercise the rights licensed immediately upon issuance of the license at the end of the licensing process for the transaction, provided that you have disclosed complete and accurate details of your proposed use, no license is finally effective unless and until full payment is received from you (either by publisher or by CCC) as provided in CCC's Billing and Payment terms and conditions. If
