# Supplementary material
Source: PubMed Central journal article supplement (PMC6374155)
Supplement: NIHMS1517958-supplement-Permission_to_Reprint_Figure_3.pdf [file NIHMS1517958-supplement-Permission_to_Reprint_Figure_3.pdf]

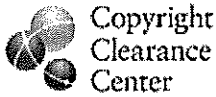

**Confirmation Number: 11767658**  
**Order Date: 11/23/2018**

#### Customer Information

**Customer:** Marc Lande  
**Account Number:** 3000516011  
**Organization:** Marc Lande  
**Email:** marc\_land@urmc.rochester.edu  
**Phone:** +1 (585) 275-9784  
**Payment Method:** Invoice

### This is not an invoice

#### Order Details

AMERICAN SOCIETY OF NEPHROLOGY. CLINICAL JOURNAL. ONLINE

Billing Status:  
N/A

|                                                      |                                                                                                                                                                                                                          |
|------------------------------------------------------|--------------------------------------------------------------------------------------------------------------------------------------------------------------------------------------------------------------------------|
| <b>Order detail ID:</b> 71674015                     | <b>Permission Status:</b> <b>Granted</b>                                                                                                                                                                                 |
| <b>ISSN:</b> 1555-905X                               | <b>Permission type:</b> Republish or display content                                                                                                                                                                     |
| <b>Publication Type:</b> e-Journal                   | <b>Type of use:</b> Journal/magazine                                                                                                                                                                                     |
| <b>Volume:</b>                                       | <b>Order License Id:</b> 4474790215908                                                                                                                                                                                   |
| <b>Issue:</b>                                        |                                                                                                                                                                                                                          |
| <b>Start page:</b>                                   | <b>Requestor type:</b> Author of requested content                                                                                                                                                                       |
| <b>Publisher:</b> AMERICAN SOCIETY OF NEPHROLOGY     | <b>Format:</b> Print, Electronic                                                                                                                                                                                         |
| <b>Author/Editor:</b> American Society of Nephrology | <b>Portion:</b> chart/graph/table/figure                                                                                                                                                                                 |
|                                                      | <b>Number of charts/graphs/tables/figures:</b> 1                                                                                                                                                                         |
|                                                      | <b>The requesting person/organization:</b> Marc Lande                                                                                                                                                                    |
|                                                      | <b>Title or numeric reference of the portion (s):</b> Figure 1                                                                                                                                                           |
|                                                      | <b>Title of the article or chapter the portion is from:</b> Casual blood pressure and neurocognitive function in children with chronic kidney disease: a report of the children with chronic kidney disease cohort study |
|                                                      | <b>Editor of portion(s):</b> N/A                                                                                                                                                                                         |
|                                                      | <b>Author of portion(s):</b> Marc Lande                                                                                                                                                                                  |
|                                                      | <b>Volume of serial or monograph:</b> 6                                                                                                                                                                                  |
|                                                      | <b>Issue, if republishing an article from a serial:</b> 8                                                                                                                                                                |
|                                                      | <b>Page range of portion:</b> 1835                                                                                                                                                                                       |
|                                                      | <b>Publication date of portion:</b> 2011 Aug                                                                                                                                                                             |
|                                                      | <b>Rights for:</b> Main product                                                                                                                                                                                          |
|                                                      | <b>Duration of use:</b> Life of current and all future editions                                                                                                                                                          |
|                                                      | <b>Creation of copies for the disabled:</b> no                                                                                                                                                                           |

|                                              |                                  |
|----------------------------------------------|----------------------------------|
| <b>With minor editing privileges</b>         | no                               |
| <b>For distribution to</b>                   | Worldwide                        |
| <b>In the following language(s)</b>          | Original language of publication |
| <b>With incidental promotional use</b>       | no                               |
| <b>Lifetime unit quantity of new product</b> | Up to 44,999                     |
| <b>Title of new article</b>                  | BP and cognition in children     |
| <b>Lead author</b>                           | Marc Lande                       |
| <b>Title of targeted journal</b>             | Hypertension                     |
| <b>Publisher</b>                             | Wolters Kluwer Health, LWW       |
| <b>Expected publication date</b>             | Feb 2019                         |

**Note:** This item was invoiced separately through our **RightsLink service**. More info

**\$ 0.00**

**Total order items: 1**

**Order Total: \$0.00**

[About Us](#) | [Privacy Policy](#) | [Terms & Conditions](#) | [Pay an Invoice](#)

Copyright 2018 Copyright Clearance Center
