# Supplementary material
Source: PubMed Central journal article supplement (PMC6374155)
Supplement: NIHMS1517958-supplement-Permission_to_Reprint_Figure_4.pdf [file NIHMS1517958-supplement-Permission_to_Reprint_Figure_4.pdf]

**WOLTERS KLUWER HEALTH, INC. LICENSE  
TERMS AND CONDITIONS**

Dec 28, 2018

This Agreement between Marc Lande ("You") and Wolters Kluwer Health, Inc. ("Wolters Kluwer Health, Inc.") consists of your license details and the terms and conditions provided by Wolters Kluwer Health, Inc. and Copyright Clearance Center.

|                                        |                                                                     |
|----------------------------------------|---------------------------------------------------------------------|
| License Number                         | 4478400335344                                                       |
| License date                           | Nov 29, 2018                                                        |
| Licensed Content Publisher             | Wolters Kluwer Health, Inc.                                         |
| Licensed Content Publication           | Stroke                                                              |
| Licensed Content Title                 | Hypertension Impairs Vascular Reactivity in the Pediatric Brain     |
| Licensed Content Author                | Linda J. Wong, Juan C. Kupferman, Isak Prohovnik, et al             |
| Licensed Content Date                  | May 26, 2011                                                        |
| Licensed Content Volume                | 42                                                                  |
| Licensed Content Issue                 | 7                                                                   |
| Type of Use                            | Journal/Magazine                                                    |
| Requestor type                         | Academic/Educational                                                |
| STM publisher name                     |                                                                     |
| Sponsorship                            | No Sponsorship                                                      |
| Format                                 | Print and electronic                                                |
| Portion                                | Figures/table/illustration                                          |
| Number of figures/tables/illustrations | 1                                                                   |
| Figures/tables/illustrations used      | Figure 2                                                            |
| Author of this Wolters Kluwer article  | Yes                                                                 |
| Will you be translating?               | No                                                                  |
| Title of the content                   | BP and cognition in children                                        |
| Publication the new content is in      | Hypertension                                                        |
| Publisher of your content              | Wolters Kluwer Health, LWW                                          |
| Author of the content                  | Marc Lande                                                          |
| Expected publication date              | Feb 2019                                                            |
| Estimated size of content (pages)      | 3                                                                   |
| Requestor Location                     | Marc Lande<br>601 Elmwood Ave<br>Box 777<br><br>Rochester, NY 14642 |

United States  
Attn: Marc Lande

Publisher Tax ID 13-2932696

Billing Type Invoice

Billing Address Marc Lande  
601 Elmwood Ave  
Box 777  
  
Rochester, NY 14642  
United States  
Attn: Marc Lande

Total 0.00 USD

Terms and Conditions

### **Wolters Kluwer Terms and Conditions**

1. **Transfer of License:** Wolters Kluwer hereby grants you a non-exclusive license to reproduce this material for this purpose, and for no other use, subject to the conditions herein.
2. **Credit Line:** will be prominently placed and include: For books – the author(s), title of book, editor, copyright holder, year of publication; For journals – the author(s), title of article, title of journal, volume number, issue number, inclusive pages and website URL to the journal page.
3. **Warranties:** The requestor warrants that the material shall not be used in any manner which may be considered derogatory to the title, content, or authors of the material, or to Wolters Kluwer.
4. **Indemnity:** You hereby indemnify and hold harmless Wolters Kluwer and their respective officers, directors, employees and agents, from and against any and all claims, costs, proceeding or demands arising out of your unauthorized use of the Licensed Material.
5. **Geographical Scope:** Permission granted is non-exclusive, and is valid throughout the world in the English language and the languages specified in your original request.
6. Wolters Kluwer cannot supply the requestor with the original artwork, electronic files or a "clean copy."
7. Permission is valid if the borrowed material is original to a Wolters Kluwer imprint (Lippincott-Raven Publishers, Williams & Wilkins, Lea & Febiger, Harwal, Rapid Science, Little Brown & Company, Harper & Row Medical, American Journal of Nursing Co, and Urban & Schwarzenberg - English Language, Raven Press, Paul Hoeber, Springhouse, Ovid).
8. **Termination of contract:** If you opt not to use the material requested above please notify RightsLink or Wolters Kluwer within 90 days of the original invoice date.
9. This permission does not apply to images that are credited to publications other than Wolters Kluwer books/journals or its Societies. For images credited to non-Wolters Kluwer books or journals, you will need to obtain permission from the source referenced in the figure or table legend or credit line before making any use of the image(s) or table(s).
10. **Modifications:** With the exception of text size or color, no Wolters Kluwer material is permitted to be modified or adapted without publisher approval.
11. **Third party material:** Adaptations are protected by copyright, so if you would like to reuse material that we have adapted from another source, you will need not only our permission, but the permission of the rights holder of the original material. Similarly, if you want to reuse an adaptation of original LWW content that appears in another publishers work, you will need our permission and that of the next publisher. The adaptation should be credited as follows: Adapted with permission from Wolters Kluwer: Book author, title, year of publication or Journal name, article author, title, reference citation, year of publication. Modifications are permitted on an occasional basis only and permission must be sought by Wolters Kluwer.
12. **Duration of the license:** Permission is granted for a one-time use only within 12 months from the date of this invoice. Rights herein do not apply to future reproductions, editors, revisions, or other derivative works. Once the 12 - month term has expired, permission to renew must be submitted in writing.
